# Supplementary material for: Improved VO2max Estimation by Combining a Multiple Regression Model and Linear Extrapolation Method
Source: MDPI journal article supplement (doi:10.3390/jcdd10010009), 2022-12-27
Supplement: s1 [file s1]

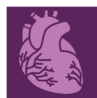

Supplementary Materials

# Improved VO<sub>2</sub>max Estimation by Combining a Multiple Regression Model and Linear Extrapolation Method

Tomoaki Matsuo, Rina So and Fumiko Murai

**Table S1.** Validated questionnaire for VO<sub>2</sub>max estimation.

| Questions |                                                                                                            | Answer options (points*)           |
|-----------|------------------------------------------------------------------------------------------------------------|------------------------------------|
| Q1        | How frequently on average do you engage in heart rate-increasing physical tasks during working hours?      | 1. never/almost never (0)          |
|           |                                                                                                            | 2. rarely (3)                      |
|           |                                                                                                            | 3. sometimes (5)                   |
|           |                                                                                                            | 4. often (10)                      |
| Q2        | In your leisure time on a workday, how much intentional physical activity do you engage in?                | 1. never/almost never (0)          |
|           |                                                                                                            | 2. 1–3 days a month (1)            |
|           |                                                                                                            | 3. 1 or 2 days a week (2)          |
|           |                                                                                                            | 4. ≥ 3 days a week (3)             |
| Q3        | If options 2–4 were selected from Q2, please provide the average exercise time per day                     | 1. < 15 min (1)                    |
|           |                                                                                                            | 2. 15–30 min (2)                   |
|           |                                                                                                            | 3. 31–60 min (3)                   |
|           |                                                                                                            | 4. > 60 min (4)                    |
| Q4        | If options 2–4 were selected from Q2, please tell us the approximate intensity of the exercise per session | N/A (Q2 = 1)                       |
|           |                                                                                                            | 1. no sweating or panting (0)      |
|           |                                                                                                            | 2. sweating and panting (3)        |
|           |                                                                                                            | 3. strained breathing (5)          |
| Q5        | On holidays, how much intentional physical activity do you engage in?                                      | 4. to the point of exhaustion (10) |
|           |                                                                                                            | N/A (Q2 = 1)                       |
|           |                                                                                                            | 1. never/almost never (0)          |
|           |                                                                                                            | 2. 1–2 days a month (1)            |
| Q6        | If options 2–4 were selected from Q5, please provide the average exercise time per day                     | 3. once a week (2)                 |
|           |                                                                                                            | 4. ≥ 2 days a week (3)             |
|           |                                                                                                            | 1. < 15 min (1)                    |
|           |                                                                                                            | 2. 15–30 mins (2)                  |
| Q7        | If options 2–4 were selected from Q5, please tell us the approximate intensity of the exercise per session | 3. 31–60 min (3)                   |
|           |                                                                                                            | 4. > 60 min (4)                    |
|           |                                                                                                            | N/A (Q5 = 1)                       |
|           |                                                                                                            | 1. no sweating or panting (0)      |
|           |                                                                                                            | 2. sweating and panting (3)        |
|           |                                                                                                            | 3. strained breathing (5)          |
|           |                                                                                                            | 4. to the point of exhaustion (10) |
|           |                                                                                                            | N/A (Q5 = 1)                       |

\*If the respondent selects option #1 on Q2, the scores on Q3 and Q4 are zero. Similarly, if the respondent selects option #1 on Q5, the scores on Q6 and Q7 are zero. The PA score (0–44 points) is calculated by adding the points from Q1–Q7.
